# Supplementary material for: Structural basis for the Smad5 MH1 domain to recognize different DNA sequences
Source: PubMed Central journal article supplement — Nucleic Acids Res. 2017 Mar 28;45(10):6255–7. doi: 10.1093/nar/gkx226 (PMC5449633; doi:10.1093/nar/gkx226), 2017-03-28
Supplement: gkx226_Supp.pdf [file gkx226_Supp.pdf]

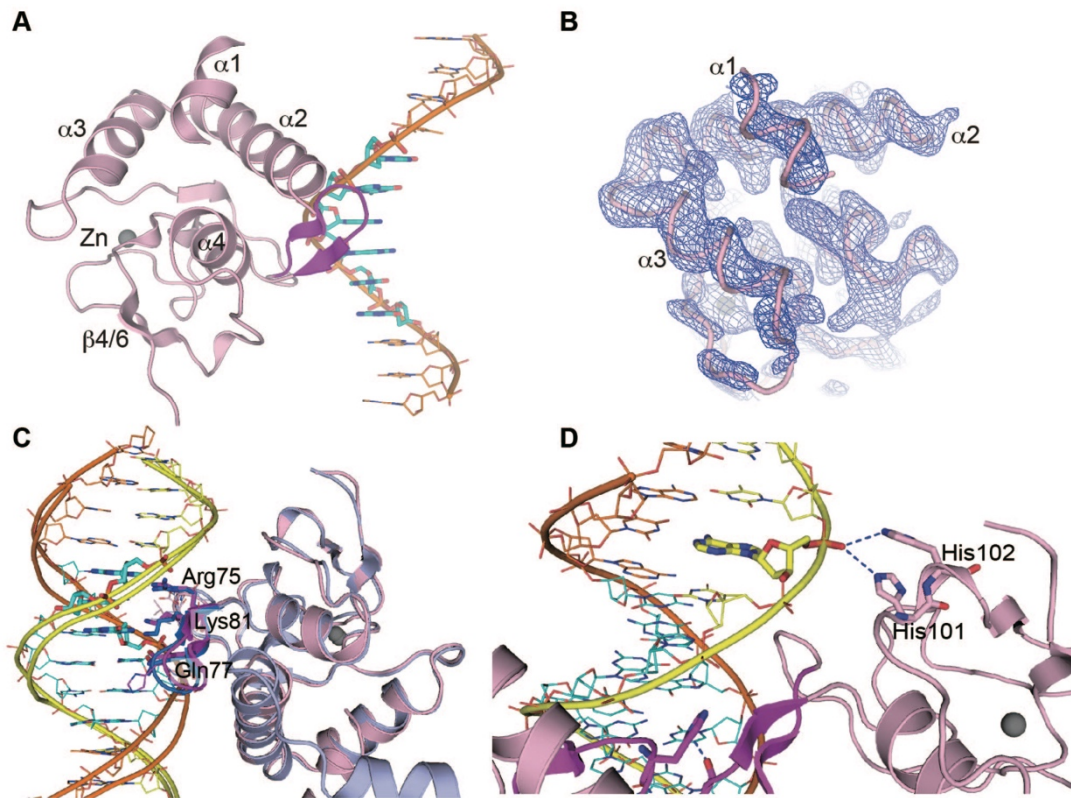

Figure S3. (A) One Smad5-MH1 monomer and a single GC-BRE DNA strand in an asymmetric unit of the Smad5-MH1/GC-BRE complex structure of  $P6_422$  space group. The color scheme of Smad5-MH1 and DNA follows that in Figure 3A. (B) The 2Fo-Fc electron density of helix  $\alpha 1$  in the Smad5-MH1/GC-BRE complex structure (contoured at  $1.0 \sigma$ ). (C) The 1:1 Smad5-MH1/SBE complex is superimposed with the 1:1 Smad5-MH1/GC-BRE complex, displaying the differences in the conformation of the three conserved  $\beta$ -hairpin residues. (D) His101 and His102 in Smad5-MH1 contact the DNA phosphate of the flanking sequence around the central GC-rich site.
